# Supplementary material for: A Double-Edged Sword: Diversity Within Religion and Market Emergence
Source: Atypon-hosted journal article supplement (doi:10.1287/orsc.2019.1327), 2020-03-11
Supplement: orsc.2019.1327.sm1.docx [file orsc.2019.1327.sm1.docx]

**A Double-Edged Sword: Diversity within Religion and Market Emergence**

## Online Appendix

Tables 2a and 2b present sample distributions by country, and the numbers indicate the count of observations. The samples not only include countries from traditional Islamic regions but also more secular countries such as the U.S. and the U.K. The number of observations differs in these two sets of analysis because fewer data are available for assets under management than for founding rates.

### **Table 2a: Sample Distribution by Country for Founding Rates**

| Country | Number of Observations |
| --- | --- |
|  |  |
| Australia | 16 |
| Bahrain | 13 |
| Bangladesh | 15 |
| Canada | 16 |
| Egypt | 16 |
| France | 16 |
| India | 16 |
| Indonesia | 16 |
| Ireland | 16 |
| Kuwait | 14 |
| Malaysia | 16 |
| Mauritius | 12 |
| Netherlands | 15 |
| Qatar | 7 |
| Russia | 15 |
| Singapore | 16 |
| South Africa | 13 |
| Sri Lanka | 10 |
| Switzerland | 15 |
| Thailand | 16 |
| United Kingdom | 16 |
| United States | 16 |

### **Table 2b: Sample Distribution by Country for Assets under Management**

| Country | Number of Observations |
| --- | --- |
|  |  |
| Australia | 3 |
| Bahrain | 8 |
| Canada | 8 |
| France | 3 |
| Indonesia | 5 |
| Ireland | 13 |
| Kuwait | 10 |
| Malaysia | 9 |
| Mauritius | 3 |
| Qatar | 2 |
| Singapore | 15 |
| South Africa | 13 |
| Switzerland | 4 |
| United Kingdom | 3 |
| United States | 12 |

Table 6 and Table 7 present robustness checks. First, a different model choice did not affect the findings. I used the fixed-effects Poisson model with robust standard errors and obtained consistent results (Table 6, Model 17). Second, the findings are robust to alternative measurements of dependent variables. I used Islamic assets as a percentage of GDP and as a percentage of all equities’ values in the market, and the results remained consistent (Table 6, Models 18 and 19). Third, the findings are robust to the removal of potential outliers. I winsorized all variables at the 2.5% level (both top and bottom), and the results remained consistent (Table 6, Models 20 and 21). The findings also hold when we remove Ireland, which an offshore financial center (Table 6, Models 22 and 23). Finally, the increased new funds may also raise competition which in turn can reduce market performance, so the effect might be attributed to founding rates rather than religious diversity per se. I added founding rates as an additional control (Table 7) and the results remain consistent.

### **Table 6: Other Robustness Checks I**

|  | Model 17 | Model 18 | Model 19 | Model 20 | Model 21 | Model 22 | Model 23 |
| --- | --- | --- | --- | --- | --- | --- | --- |
|  | Supply, Poisson model | Demand, Islamic assets / all equities | Demand, Islamic assets / GDP | Supply, winsorized 2.5% | Demand, winsorized 2.5% | Supply, no Ireland | Demand, no Ireland |
| GDP per capita(log) | 0.76 (0.39) | 4.73 (1.27) | 4.96 (1.12) | 1.38* (2.28) | 4.50 (1.18) | 1.32* (2.32) | 8.11+ (2.05) |
| Financial openness | -0.63** (-3.18) | 0.68* (2.33) | 0.51+ (1.97) | -0.42* (-2.14) | 0.45 (1.56) | -0.45* (-2.22) | 0.80* (2.93) |
| Education | 0.70 (0.59) | 0.30 (1.01) | 0.23 (0.63) | 1.09+ (1.88) | 0.32 (0.97) | 1.47** (2.77) | 0.12 (0.17) |
| FDI(%GDP) | 0.06*** (3.37) | -0.01 (-0.14) | -0.00 (-0.09) | 0.08* (2.22) | -0.00 (-0.01) | 0.08* (2.28) | -0.07 (-1.77) |
| Dependence on IDB | 59.51 (1.08) | -27.71 (-0.17) | -27.58 (-0.16) | 48.59 (0.30) | 145.20 (0.39) | 140.81 (1.47) | -88.16 (-0.84) |
| Islamic finance headquarters | 0.40 (0.69) | -0.92* (-2.58) | -0.95* (-2.30) | 0.16 (0.26) | -0.93* (-2.33) | 0.25 (0.40) | -0.63 (-1.53) |
| Fuel export (log) | -0.06 (-1.00) | 0.11 (0.54) | 0.11 (0.58) | -0.06 (-0.39) | -0.03 (-0.07) | -0.09 (-0.64) | 0.13 (0.57) |
| Real interest rate | 0.00 (0.30) | 0.00 (0.15) | 0.00 (0.09) | 0.02 (0.82) | 0.01 (0.74) | 0.02 (0.98) | -0.00 (-0.11) |
| Trade cohesion | 0.03 (0.07) | -0.01 (-0.72) | -0.01 (-0.58) | 0.91 (1.45) | -0.01 (-0.64) | 0.05 (0.13) | -0.01 (-0.92) |
| Islamic population(log) | -2.40+ (-1.73) | -1.35 (-1.51) | -1.32 (-1.41) | 1.46*** (3.63) | -0.94 (-0.93) | 1.59*** (4.15) | -0.98+ (-1.78) |
| Market logic | 0.05 (1.26) | 0.13* (2.48) | 0.11+ (1.97) | -0.00 (-0.01) | 0.11* (2.17) | 0.01 (0.44) | 0.13+ (1.84) |
| State logic | -0.04 (-0.97) | 0.21 (1.31) | 0.18 (1.23) | 0.01 (0.15) | 0.06 (0.54) | 0.03 (0.61) | 0.22 (1.11) |
| Religious diversity within Islam | 10.46** (2.60) | -26.28* (-2.96) | -24.80* (-2.78) | 6.20* (2.19) | -19.68** (-3.24) | 6.00* (2.41) | -29.48* (-2.57) |
| Constant |  | -27.82*** (-10.53) | -28.05*** (-9.80) | -52.51*** (-3.98) | -27.14 (-0.59) | -3.24** (-3.10) | -29.28*** (-9.33) |
| Observations | 321 | 111 | 111 | 321 | 111 | 305 | 98 |
| Countries | 22 | 15 | 15 | 22 | 15 | 21 | 14 |
| + *p* < 0.10, * *p* < 0.05, ** *p* < 0.01, *** *p* < 0.001. *t* statistics are in parentheses.  Country fixed effects and year dummies are included in all models. | | | | | | | |

### **Table 7: Other Robustness Checks II**

|  | Model 24 | Model 25 | Model 26 | Model 27 | Model 28 |
| --- | --- | --- | --- | --- | --- |
| GDP per capita(log) | 2.01 (0.47) | 5.68 (1.39) | 5.52 (1.24) | 7.28+ (1.97) | 7.17 (1.74) |
| Financial openness | 0.22 (0.55) | 0.22 (0.73) | 0.21 (0.69) | 0.15 (0.62) | 0.14 (0.61) |
| Education | 0.52 (1.35) | 0.23 (0.69) | 0.20 (0.66) | 0.14 (0.42) | 0.13 (0.41) |
| FDI(%GDP) | 0.01 (0.17) | -0.01 (-0.15) | -0.01 (-0.16) | -0.01 (-0.17) | -0.01 (-0.18) |
| Dependence on IDB | -8.87 (-0.05) | -54.08 (-0.35) | -70.44 (-0.58) | -59.91 (-0.56) | -70.46 (-0.81) |
| Islamic finance headquarters | -0.45 (-1.33) | -0.36 (-1.03) | -0.44 (-0.82) | -0.63 (-1.48) | -0.69 (-1.08) |
| Fuel export (log) | -0.03 (-0.14) | 0.03 (0.19) | 0.01 (0.05) | 0.07 (0.41) | 0.06 (0.33) |
| Real interest rate | 0.03 (1.57) | 0.00 (0.19) | 0.01 (0.24) | 0.01 (0.30) | 0.01 (0.33) |
| Trade cohesion(assets) | 0.01 (0.74) | -0.01 (-0.75) | -0.01 (-0.69) | -0.01 (-0.57) | -0.01 (-0.55) |
| Islamic population(log) | -1.40 (-1.15) | -1.00 (-1.03) | -1.05 (-1.02) | -0.15 (-0.18) | -0.19 (-0.22) |
| Market logic | 0.09 (1.34) | 0.10+ (1.86) | -0.03 (-0.06) | 0.06 (1.00) | -0.03 (-0.05) |
| State logic | -0.15 (-1.73) | 0.16 (1.15) | 0.14 (0.69) | -0.59+ (-2.04) | -0.60+ (-1.97) |
| Islamic fund founding rates | 0.07* (2.45) | 0.06* (2.25) | 0.06* (2.52) | 0.06* (2.37) | 0.06* (2.58) |
| Religious diversity within Islam |  | -26.74** (-3.20) | -33.57 (-1.66) | -42.37*** (-5.47) | -46.70+ (-1.90) |
| Religious diversity within Islam × Market logic |  |  | 0.14 (0.27) |  | 0.09 (0.17) |
| Religious diversity within Islam × State logic |  |  |  | 1.11** (3.32) | 1.10** (3.28) |
| Constant | -11.59 (-0.22) | -30.76 (-0.66) | -21.49 (-0.33) | -42.92 (-1.09) | -36.84 (-0.60) |
| R-square | 0.54 | 0.59 | 0.59 | 0.63 | 0.63 |
| Observations | 111 | 111 | 111 | 111 | 111 |
| Firms | 15 | 15 | 15 | 15 | 15 |
| + *p* < 0.10, * *p* < 0.05, ** *p* < 0.01, *** *p* < 0.001. *t* statistics in parentheses  Country fixed effects and year dummies are included in all models. | | | | | |
